# Supplementary material for: Causes, patterns and severity of androgen excess in 487 consecutively recruited pre- and post-pubertal children
Source: PubMed Central journal article supplement (PMC6365673; doi:10.1530/eje-18-0854), 2018-12-19

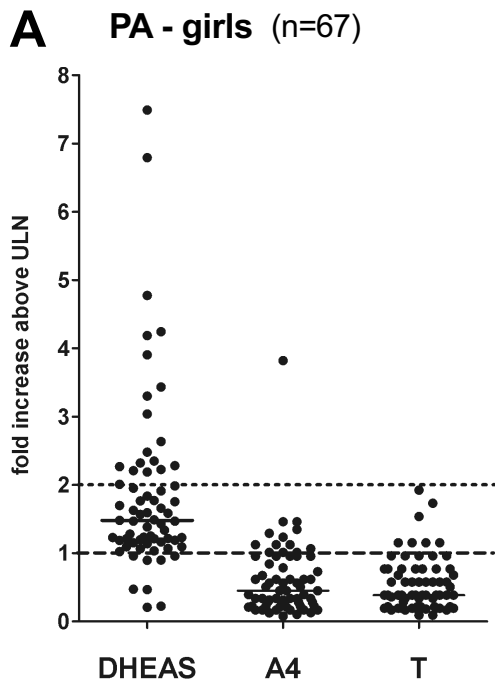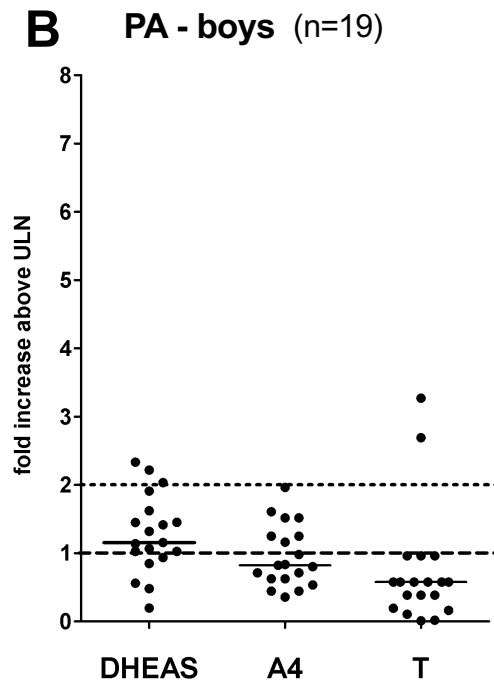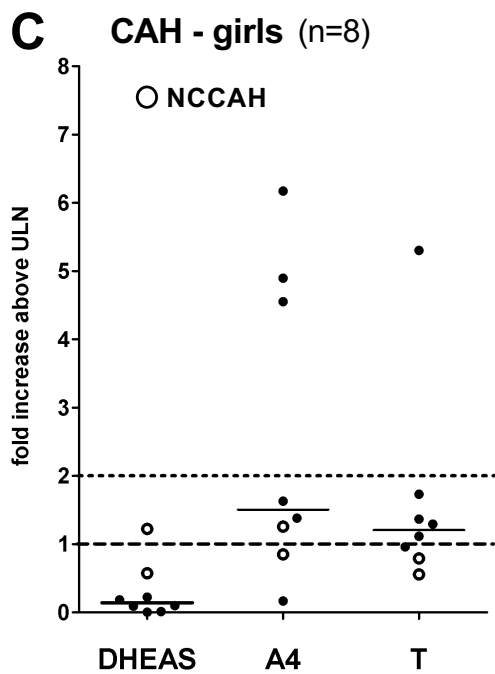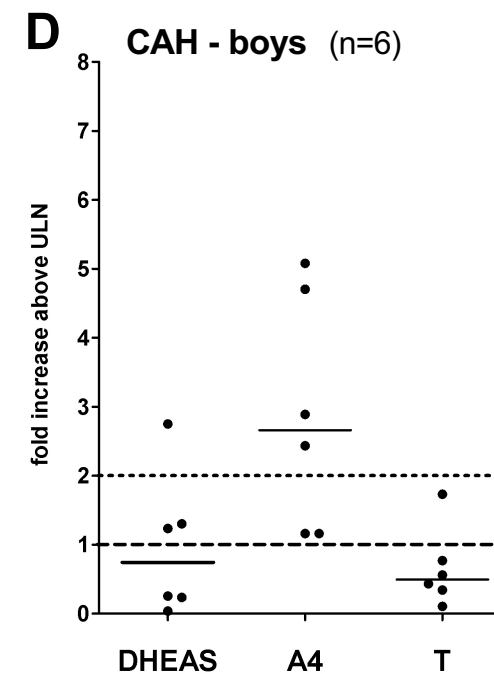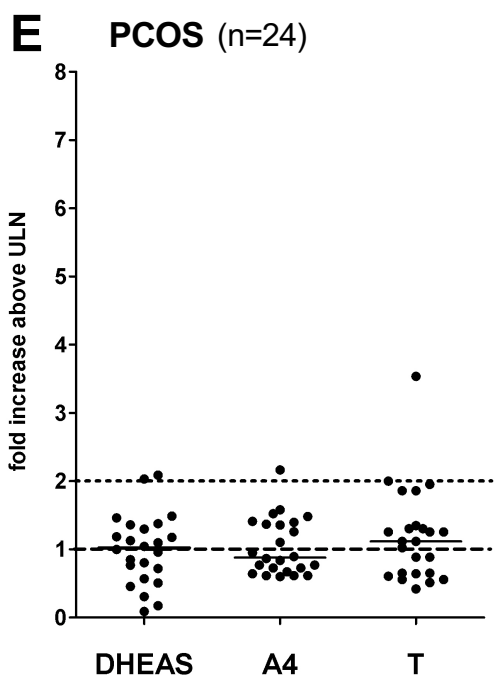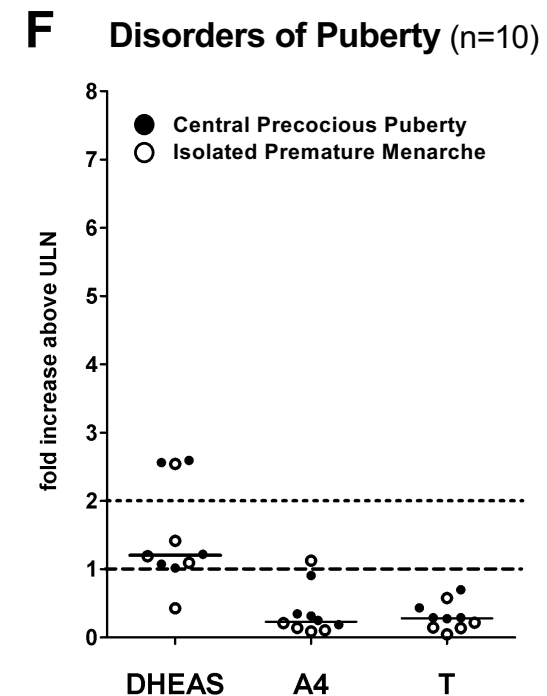

Supplement: supplementary_figure_1.pdf [file supplementary_figure_1.pdf]
