# Supplementary material for: Causes, patterns and severity of androgen excess in 487 consecutively recruited pre- and post-pubertal children
Source: PubMed Central journal article supplement (PMC6365673; doi:10.1530/eje-18-0854), 2018-12-19
Supplement: supplementary_table_1.pdf [file supplementary_table_1.pdf]

**Suppl. Table 1:** Miscellaneous diagnoses and features (as specified in Fig. 1) identified in 63 patients with at least one serum androgen concentration increased above the Tanner stage-specific reference range, but no conclusive diagnosis explaining androgen excess.

|                                                                                               | Pre-pubertal<br>N=41            |                                                                | Post-pubertal<br>N=22                                          |                                 |
|-----------------------------------------------------------------------------------------------|---------------------------------|----------------------------------------------------------------|----------------------------------------------------------------|---------------------------------|
|                                                                                               | Girls                           | Boys                                                           | Girls                                                          | Boys                            |
| <b>Diagnoses/ features likely to be associated with or due to androgen excess</b><br>N=13     | N=4                             | N=3                                                            | N=6                                                            | N=0                             |
|                                                                                               | Clitoromegaly, resolving (n=2)  | Bilateral adrenal hemorrhages                                  | Clitoromegaly (resolved)                                       |                                 |
|                                                                                               | Hypertrichosis, resolving       | Germ cell tumor                                                | Isolated acne (n=2)                                            |                                 |
|                                                                                               | Isolated thelarche              | Anti-Müllerian-Hormone resistance                              | Oligomenorrhea (resolved)<br>Excessive sweating<br>Mood swings |                                 |
| <b>Diagnoses/ features not likely to be associated with or due to androgen excess</b><br>N=50 | N=13                            | N=21                                                           | N=13                                                           | N=3                             |
|                                                                                               | No diagnosis (n=5)              | No diagnosis (n=9)                                             | Simple Obesity (n=9)                                           | Delay of growth and puberty     |
|                                                                                               | Complex cloacal anomaly         | Micropenis (n=2)                                               | Road traffic accident                                          | Buried penis, impalpable testes |
|                                                                                               | Electrolyte abnormalities       | Klinefelter syndrome                                           | Bardet Biedl Syndrome                                          | Wiedemann Beckwith Syndrome     |
|                                                                                               | Primary ovarian failure         | Septo-optic dysplasia (n=2)                                    | Atopic skin                                                    |                                 |
|                                                                                               | Alström syndrome (n=2)          | Pubertal arrest/ primary gonadal failure                       | Silver Russell Syndrome                                        |                                 |
|                                                                                               | CHARGE syndrome                 | CHARGE syndrome                                                |                                                                |                                 |
|                                                                                               | Obesity                         | Hypospadias (n=2)                                              |                                                                |                                 |
|                                                                                               | Aldosterone synthase deficiency | Alström syndrome<br>Prader Willi syndrome<br>Supra-sellar cyst |                                                                |                                 |
