# Supplementary material for: Causes, patterns and severity of androgen excess in 487 consecutively recruited pre- and post-pubertal children
Source: PubMed Central journal article supplement (PMC6365673; doi:10.1530/eje-18-0854), 2018-12-19
Supplement: supplementary_table_2.pdf [file supplementary_table_2.pdf]

**Suppl. Table 2:** Clinical signs and symptoms in 86 children presenting with premature adrenarche

|                                        | <b>Total</b><br>N=86 (100%) | <b>Girls</b><br>N=67 (79%) | <b>Boys</b><br>N=18 (21%) |
|----------------------------------------|-----------------------------|----------------------------|---------------------------|
| Premature Pubarche                     | 60<br>(71%)                 | 50<br>(75%)                | 10<br>(56%)               |
| Body odor                              | 48<br>(56%)                 | 38<br>(57%)                | 10<br>(56%)               |
| Premature development of axillary hair | 25<br>(29%)                 | 21<br>(31%)                | 4<br>(22%)                |
| Tall stature/ growth acceleration      | 21<br>(25%)                 | 17<br>(31%)                | 4<br>(22%)                |
| Acne                                   | 14<br>(17%)                 | 13<br>(19%)                | 1<br>(6%)                 |
| Mood swings                            | 14<br>(17%)                 | 11<br>(16%)                | 3<br>(17%)                |
| Breast development/ gynecomastia       | 12<br>(14%)                 | 11<br>(16%)                | 1<br>(6%)                 |
